# Supplementary material
Source: PubMed Central journal article supplement (PMC6821953)
Supplement: AEM.01903-19-s0001.pdf [file AEM.01903-19-s0001.pdf]

**Horizontal gene transfer and acquired antibiotic resistance in *S. Heidelberg* following *in vitro* incubation in broiler ceca**

¶Adelumola Oladeinde<sup>1\*</sup>, ¶Kimberly Cook<sup>1</sup>, &Steven M. Lakin<sup>2</sup>, &Reed Woyda<sup>2</sup>, &Zaid Abdo<sup>2</sup>, &Torey Looft<sup>3</sup>, &Kyler Herrington<sup>4</sup>, &Gregory Zock<sup>1</sup>, &Jodie Plumlee Lawrence<sup>1</sup>, &Jesse C. Thomas IV<sup>5</sup>, &Megan S. Beaudry<sup>5</sup>, &Travis Glenn<sup>5</sup>

**Authors' Affiliation**

<sup>1</sup>Bacterial Epidemiology and Antimicrobial Resistance Research Unit, U.S. National Poultry Research Center, USDA-ARS, Athens, GA, USA. <sup>2</sup>Department of Microbiology, Immunology and Pathology, Colorado State University, Fort Collins, Colorado, USA. <sup>3</sup>National Animal Disease Center, USDA-ARS, Ames, IA, USA, <sup>4</sup>Department of Microbiology, University of Georgia, Athens, GA, USA. <sup>5</sup>Department of Environmental Health Science, University of Georgia, Athens, GA, USA.

**Corresponding author\*** [ade.oladeinde@ars.usda.gov](mailto:ade.oladeinde@ars.usda.gov)

¶ These authors contributed equally to this work.

& These authors also contributed equally to this work.

23

## 24 **Text S1**

### 25 **Benchmarking of resistome enrichment**

26 Resistome dataset was benchmarked against WGS data of susceptible and MDR strains of *S.*  
27 Heidelberg (n= 2), *S. Kentucky* (n= 3), *S. Enteritidis* (n= 1), *Campylobacter jejuni* (n= 3),  
28 *Campylobacter coli* (n= 4) and *E. faecalis* (n= 4). These strain were collected as part of an on-  
29 going AMR monitoring project. Antimicrobial susceptibility testing, WGS and resistome  
30 enrichment was done for each isolate. De novo assembly was done on WGS and resistome Fastq  
31 reads using SPaDes. Contigs were queried against ResFinder for acquired ARG determination and  
32 against CARD for global transcriptional regulator histone-like nucleoid structuring (H-NS).

33 We chose this reference gene because it is present in the majority of Gram-negative bacteria  
34 including *E. coli* at high copies per genome and plays a central role in the silencing of newly  
35 acquired genes or mobile elements (1). Consequently, H-NS is required for the regulation of ~ 5%  
36 of *E. coli* genes including plasmid or phage genes (1, 2). Therefore, ARG's that are inactive or  
37 silenced will be lower in abundance compared to H-NS. The relative abundance of an ARG (log<sub>2</sub>  
38 fold-change) was determined from the coverage of the contig carrying the ARG, normalized  
39 against the coverage of H-NS. This calculation may be biased towards Gram-positive bacteria that  
40 are not known to harbor H-NS. Lastly, we performed a correlation test (Kendall Tau) to evaluate  
41 the relationship between WGS-derived and enrichment-derived relative abundance.

### 42 **Illumina short read and MinION long read hybrid assembly**

43 Sequencing was performed with both MiSeq (Illumina, Inc. San Diego, CA) and MinION (Oxford  
44 Nanopore Technologies Ltd, Oxford, UK) to obtain short and long reads respectively in fastq

45 format. Initial read number and read quality for the illumina reads was assessed with FastQC  
46 (<https://www.bioinformatics.babraham.ac.uk/projects/fastqc/>) on default settings and compiled  
47 into a report using MultiQC (<https://github.com/ewels/MultiQC>). Porechop  
48 (<https://github.com/rrwick/Porechop>) was used to demultiplex the MinION reads into their  
49 respective samples via barcode and read quality was assessed with NanoPlot  
50 (<http://nanoplot.bioinf.be/>). Trimmomatic (3) was used for read trimming on the illumina short-  
51 read data with a phred quality score of 15. Both trimmed and non-trimmed data, along with  
52 MinION long-reads, were then assembled with SPAdes using the ‘--careful’ option, resulting in a  
53 hybrid assembly. QUAST, followed by MultiQC, was used to generate a report of assembly  
54 statistics using reference genomes relevant to each sample.

55

56

57

58

59

60

61

62

63

64

65

66

67

68

69

70 **Table S1.** Primers used for this study.

| Assay name                  | Primer | Primer sequence (5' - 3')    | Target Gene                             | Genome     | Amplification factor | Melt curve (T <sub>m</sub> ) | Reference     |
|-----------------------------|--------|------------------------------|-----------------------------------------|------------|----------------------|------------------------------|---------------|
| <i>gapA</i>                 | F      | TTGGAGATGTGAGC<br>AATC       | Glyceraldehyde-6-<br>dehydrogenase      | Chromosome | 1.93                 | 80.5 °C                      | (4)           |
|                             | R      | GACAACTTCGTGAA<br>ACTG       |                                         |            |                      |                              |               |
| repB_1<br>ncX1              | F      | TGGACATACGAAGA<br>AGAG       | Pir Family of<br>Replicase              | Plasmid    | 1.90                 | 79.5 °C                      | (4)           |
|                             | R      | AACCTGAGTAGTGT<br>AAGAAT     |                                         |            |                      |                              |               |
| IncK2                       | F      | CTTATCTTATCTATT<br>GCCACATA  | <i>incRNAi</i> -<br>replication protein | Plasmid    | 1.99                 | 83 °C                        | This<br>study |
|                             | R      | CACTCTTGTTAGCC<br>TTGT       |                                         |            |                      |                              |               |
| IncK2_<br>marta             | F      | ATGCTCGCGGTCCG<br>GAAAGCC    | <i>incRNAi</i> -<br>replication protein | Chromosome | ND                   | 81.0 °C                      | (5)           |
|                             | R      | GTGCCGTGCGTTAA<br>TGCACTGCAA |                                         |            |                      |                              |               |
| <i>repL</i>                 | F      | CCAATCAACCGTCG<br>TTCGTG     | Lytic replication<br>gene               | Chromosome | 2.63                 | 88.5 °C                      | (6)           |
|                             | R      | TAAGCATATTTCCG<br>CGCTGC     |                                         |            |                      |                              |               |
| <i>bla</i> <sub>CMY-2</sub> | F      | ACTCCGGGCGCTAA<br>GCGACTTTAC | CMY-2                                   | Plasmid    | 1.85                 | 87.5 °C                      | (7)           |
|                             | R      | CGCCAATACGCCAG<br>TAGCGAGACT |                                         |            |                      |                              |               |

71 Note.

72 F- Forward primer, R - Reverse primer , ND- Not determined

73

74

75

76

77

78

79

80

81 **Table S2:** Mutations acquired by *S. Heidelberg* isolates following incubation in broiler ceca <sup>a</sup>.

| Loci on reference genome | Location <sup>b</sup> | Product                                                                   | Mutation change <sup>c</sup> |
|--------------------------|-----------------------|---------------------------------------------------------------------------|------------------------------|
| <b>551931</b>            | <b>Intragenic</b>     | <b>Endopeptidase La</b>                                                   | <b>ND</b>                    |
| 598142                   | Intergenic            | Before Kef family K (+) transporter, after fosmidomycin resistant protein | N/A                          |
| 933383                   | Intragenic            | ATP-dependent DNA helicase (DinG)                                         | ND                           |
| <b>933947</b>            | <b>Intragenic</b>     | <b>ATP-dependent DNA helicase (DinG)</b>                                  | <b>ND</b>                    |
| 1520727                  | Intragenic            | Transcriptional regulator (SlyA)                                          | Asp84Gly                     |
| 1544026                  | Intragenic            | Fumarate hydratase                                                        | Asp416Ala                    |
| 2349475                  | Intragenic            | Thiol:disulfide interchange protein                                       | Val100Gly                    |
| <b>2688401</b>           | <b>Intragenic</b>     | <b>Fe-S protein assembly chaperone (HscA)</b>                             | <b>ND</b>                    |
| <b>2828163</b>           | <b>Intragenic</b>     | <b>Phage integrase (Int)</b>                                              | <b>ND</b>                    |
| 2889256                  | Intragenic            | MprA                                                                      | Trp140Arg                    |
| 3072149                  | Intragenic            | Cysteine sulfinatase desulfinase                                          | Val116Val                    |
| 3503197                  | ITS                   | 23S - 5S rRNA ITS                                                         | N/A                          |
| 3503199                  | ITS                   | 23S - 5S rRNA ITS                                                         | N/A                          |
| 3503200                  | ITS                   | 23S - 5S rRNA ITS                                                         | N/A                          |
| 3503201                  | ITS                   | 23S - 5S rRNA ITS                                                         | N/A                          |
| 3503202                  | ITS                   | 23S - 5S rRNA ITS                                                         | N/A                          |
| 3503203                  | ITS                   | 23S - 5S rRNA ITS                                                         | N/A                          |
| 3535133                  | Intragenic            | Translation elongation factor Tu                                          | ND                           |
| 3594515                  | Intragenic            | Two-component system sensor histidine kinase (EnvZ)                       | ND                           |

|                |                   |                                                             |                  |
|----------------|-------------------|-------------------------------------------------------------|------------------|
| <b>3948989</b> | <b>Intragenic</b> | <b>C-type cytochrome biogenesis protein (CcmF)</b>          | <b>Met550Val</b> |
| 3956264        | Intragenic        | Trimethylamine N-oxide reductase I catalytic subunit (TorA) | ND               |
| <b>4032168</b> | <b>ITS</b>        | <b>16S - 23S rRNA ITS</b>                                   | <b>N/A</b>       |
| 4087617        | Intragenic        | Magnesium and cobalt transport protein (CorA)               | ND               |
| 4087651        | Intragenic        | Magnesium and cobalt transport protein (CorA)               | ND               |
| <b>4193409</b> | <b>Intragenic</b> | <b>Two-component system sensor histidine kinase (CpxA)</b>  | <b>ND</b>        |
| 4271745        | Intragenic        | rRNA-23S ribosomal RNA                                      | N/A              |
| 4271746        | Intragenic        | rRNA-23S ribosomal RNA                                      | N/A              |
| 4271748        | Intragenic        | rRNA-23S ribosomal RNA                                      | N/A              |
| 4271751        | Intragenic        | rRNA-23S ribosomal RNA                                      | N/A              |

82 Notes.

83 <sup>a</sup> Mutations present in SH-2813<sub>nal</sub> isolates recovered from broiler ceca but absent in parental isolates are reported.

84 SNPs/indels were compared to reference genome CP016573. Boldness denotes mutations unique to isolates that  
85 acquired multidrug resistance.

86 <sup>b</sup> Intragenic - present within a coding sequence, Intergenic - Non-coding region between two genes, ITS - internal  
87 transcribed spacer.

88 <sup>c</sup> N/A - Not available (SNP/indel present in non-coding sequence), ND - not determined (indel present).

89

90

91

92

93

94

95

96 **Table S3:** Antibiotic resistance genes and efflux pumps encoded on the chromosome of SH-2813<sub>nal</sub>.

| Gene              | Drug Class                                      | Resistance Mechanism                                                                |
|-------------------|-------------------------------------------------|-------------------------------------------------------------------------------------|
| <i>AAC(6)-Iaa</i> | Aminoglycosides                                 | antibiotic inactivation                                                             |
| <i>acrB</i>       | Multidrug                                       | antibiotic efflux                                                                   |
| <i>adeF</i>       | Tetracyclines, fluoroquinolones                 | antibiotic efflux                                                                   |
| <i>bacA</i>       | Peptides                                        | antibiotic target alteration                                                        |
| <i>baeR</i>       | Aminoglycosides, aminocoumarins                 | antibiotic efflux                                                                   |
| <i>cpxA</i>       | Aminoglycosides, aminocoumarins                 | antibiotic efflux                                                                   |
| <i>CRP</i>        | Multidrug                                       | antibiotic efflux                                                                   |
| <i>emrB</i>       | Fluoroquinolones                                | antibiotic efflux                                                                   |
| <i>emrR</i>       | Fluoroquinolones                                | antibiotic efflux                                                                   |
| <i>acrA</i>       | Multidrug                                       | antibiotic efflux                                                                   |
| <i>EF-Tu</i>      | Elfamycin                                       | antibiotic target alteration                                                        |
| <i>GlpT</i>       | Fosfomycin                                      | antibiotic target alteration                                                        |
| <i>marR</i>       | Multidrug                                       | antibiotic efflux; antibiotic target alteration                                     |
| <i>mdfA</i>       | Tetracyclines, benzalkonium chloride, rhodamine | antibiotic efflux                                                                   |
| <i>nfsA</i>       | Nitrofurans                                     | antibiotic target alteration                                                        |
| <i>soxR</i>       | Multidrug                                       | antibiotic efflux; antibiotic target alteration                                     |
| <i>soxS</i>       | Multidrug                                       | antibiotic efflux; reduced permeability to antibiotic; antibiotic target alteration |
| <i>UhpT</i>       | Fosfomycin                                      | antibiotic target alteration                                                        |
| <i>FosA7</i>      | Fosfomycin                                      | antibiotic inactivation                                                             |
| <i>golS</i>       | Multidrug                                       | antibiotic efflux                                                                   |
| <i>H-NS</i>       | Multidrug                                       | antibiotic efflux                                                                   |
| <i>PBP3</i>       | Beta-lactamase                                  | antibiotic target alteration                                                        |
| <i>kdpE</i>       | Aminoglycosides                                 | antibiotic efflux                                                                   |

|             |                              |                                                       |
|-------------|------------------------------|-------------------------------------------------------|
| <i>marA</i> | Multidrug                    | antibiotic efflux; reduced permeability to antibiotic |
| <i>mdsA</i> | Beta-lactamase and phenicols | antibiotic efflux                                     |
| <i>mdsC</i> | Beta-lactamase and phenicols | antibiotic efflux                                     |
| <i>MdtK</i> | Fluoroquinolones             | antibiotic efflux                                     |
| <i>msbA</i> | Nitroimidazoles              | antibiotic efflux                                     |
| <i>patA</i> | Fluoroquinolones             | antibiotic efflux                                     |
| <i>PmrF</i> | Peptides                     | antibiotic target alteration                          |
| <i>sdiA</i> | Multidrug                    | antibiotic efflux                                     |

97 Notes.

98 The Comprehensive Antibiotic Resistance Database (CARD) was used for the identification of resistance and efflux  
99 pumps present on chromosome.

100

101

102

103

104

105

106

107

108

109

110

111

112



**Table S4:** Antibiotic resistance genes detected with WGS and resistome enrichment.

| Bacteria isolate                | ARG's detected by WGS                                       | ARG's detected by targeted enrichment of ARG's  | Resistance phenotype °            |
|---------------------------------|-------------------------------------------------------------|-------------------------------------------------|-----------------------------------|
| <i>Campylobacter coli_7</i>     | <i>blaOXA-184, tet(O)</i>                                   | <i>blaOXA-184, tet(O)</i>                       | AZI, CIP, CLI, ERY, NAL, TEL, TET |
| <i>Campylobacter coli_10</i>    | <i>aph(3')-III, aph(2'')-Ig, tet(O)</i>                     | <i>aph(3')-III, aph(2'')-Ig, tet(O)</i>         | AZI, CLI, ERY, GEN, TEL, TET      |
| <i>Campylobacter coli_12</i>    | <i>aph(3')-III, blaOXA-450, tet(O)</i>                      | <i>aph(3')-III, blaOXA-450, tet(O)</i>          | AZI, CIP, CLI, ERY, NAL, TEL, TET |
| <i>Campylobacter coli_13</i>    | <i>aph(2'')-Ig, aph(3')-III, tet(O)</i>                     | <i>aph(2'')-Ig, aph(3')-III, tet(O)</i>         | AZI, CLI, ERY, GEN, TET           |
| <i>Campylobacter jejuni_8</i>   | <i>blaOXA-450, tet(O)</i>                                   | <i>blaOXA-450, tet(O)</i>                       | AZI, CIP, ERY, GEN, NAL, TET      |
| <i>Campylobacter jejuni_9</i>   | <i>blaOXA-450, tet(O)</i>                                   | <i>blaOXA-450, tet(O)</i>                       | AZI, CIP, CLI, ERY, NAL, TEL, TET |
| <i>Campylobacter jejuni_11</i>  | <i>blaOXA-450, tet(O)</i>                                   | <i>blaOXA-450, tet(O)</i>                       | AZI, CIP, CLI, ERY, NAL, TEL, TET |
| <i>Enterococcus faecalis_15</i> | <i>aac(6')-aph(2''), lsa(A)<sup>a</sup>, tet(L), tet(M)</i> | <i>aac(6')-aph(2''), lsa(A), tet(L), tet(M)</i> | GEN, KAN, LIN, TET                |
| <i>Enterococcus faecalis_16</i> | <i>lsa(A)<sup>a</sup>, tet(O)</i>                           | <i>lsa(A), tet(O)</i>                           | LIN, TET                          |
| <i>Enterococcus faecalis_17</i> | <i>lsa(A)<sup>a</sup>, tet(M), tet(L)</i>                   | <i>lsa(A), tet(M), tet(L)</i>                   | LIN, TET                          |

|                                 |                                                                                            |                                                                                |                                                  |
|---------------------------------|--------------------------------------------------------------------------------------------|--------------------------------------------------------------------------------|--------------------------------------------------|
| <i>Enterococcus faecalis_14</i> | <i>lsa(A)</i> <sup>a</sup>                                                                 | <i>lsa(A)</i>                                                                  | LIN                                              |
| <i>Salmonella</i> Enteritidis_6 | <i>aac(6')-Iaa<sup>b</sup>, aac(3)-Via, aadA1, blaTEM-1B, sul1</i>                         | <i>aac(6')-Iaa<sup>b</sup>, aac(3)-Via, aadA1, blaTEM-1B, sul1</i>             | AMP, GEN, STR, SMX                               |
| <i>Salmonella</i> Heidelberg_5  | <i>aac(6')-Iaa<sup>b</sup>, ant(2'')-Ia, aph(3'')-Ib, aph(6)-Id, blaCMY-2, cmlA1, sul2</i> | <i>aac(6')-Iaa, ant(2'')-Ia, aph(3'')-Ib, aph(6)-Id, blaCMY-2, cmlA1, sul2</i> | AMC, AMP, FOX, TIO, CRO, CHL, GEN, KAN, STR, SMX |
| <i>Salmonella</i> Kentucky_1    | <i>aac(6')-Iaa<sup>b</sup>, aph(3'')-Ib, aph(6)-Id, blaCMY-2, tet(B)</i>                   | <i>aac(6')-Iaa, aph(3'')-Ib, aph(6)-Id, blaCMY-2, tet(B)</i>                   | AMC, AMP, FOX, TIO, CRO, STR, TET                |
| <i>Salmonella</i> Kentucky_2    | <i>aac(6')-Iaa<sup>b</sup>, aph(3'')-Ib, aph(6)-Id, blaCMY-2, tet(B)</i>                   | <i>aac(6')-Iaa, aph(3'')-Ib, aph(6)-Id, blaCMY-2, tet(B)</i>                   | AMC, AMP, FOX, TIO, CRO, STR, TET                |
| <i>Salmonella</i> Kentucky_3    | <i>aac(6')-Iaa<sup>b</sup>, aph(6)-Id, aph(3'')-Ib, sul2, dfrA14</i>                       | <i>aac(6')-Iaa, aph(6)-Id, aph(3'')-Ib, sul2, dfrA14</i>                       | SMX, COT                                         |
| <i>Salmonella</i> Kentucky_4    | <i>aac(6')-Iaa<sup>b</sup>, aph(3'')-Ib, aph(6)-Id, tet(B)</i>                             | <i>aac(6')-Iaa, aph(3'')-Ib, aph(6)-Id, tet(B)</i>                             | AMC, AMP, FOX, TIO, CRO, CHL, KAN, STR, SMX, TET |

114 <sup>a</sup> *lsa(A)* gene was identified on the chromosome of *E. faecalis* strains.

115 <sup>b</sup> *aac(6')-Iaa* gene was identified on the chromosome of *Salmonella* strains.

116 <sup>c</sup> Abbreviations: Amc - Amoxicillin/Clavulanic acid, Amp – Ampicillin, Azi - Azithromycin, Chl – Chloramphenicol,  
117 Cip - Ciprofloxacin, Cli – Clindamycin, Cot - Trimethoprim-Sulfamethoxazole, Cro – Ceftriaxone, Ery –  
118 Erythromycin, Fox - Cefoxitin, Gen – Gentamicin, Kan - Kanamycin, Lin – Lincomycin, Nal – Nalidixic acid, Smx-  
119 Sulfamethoxazole, Str - Streptomycin, Tel – telithromycin, Tet – Tetracycline, Tio - Ceftiofur,

120

121

122

123 Table S5: Illumina/MinION hybrid assembly statistics and plasmids identified.

| Strain ID<br>(phylogroup) <sup>a</sup> | N50 (bp)                              |                                    | Largest contig (bp)                   |                                                 | Plasmids (ARG)                               | Plasmid<br>contig size<br>(bp) <sup>c</sup> |
|----------------------------------------|---------------------------------------|------------------------------------|---------------------------------------|-------------------------------------------------|----------------------------------------------|---------------------------------------------|
|                                        | Illumina<br>short<br>read<br>assembly | Illumina/MinION<br>hybrid assembly | Illumina<br>short<br>read<br>assembly | Illumina/MinION hybrid<br>assembly <sup>b</sup> |                                              |                                             |
| Ec15ceca (A)                           | 59,000                                | 4,728,800                          | 35,500                                | 4,728,800                                       | IncFIB (tetA)                                | 100,085                                     |
|                                        |                                       |                                    |                                       |                                                 | Col440i                                      | 3,384                                       |
| Ec6BL (D)                              | 145,000                               | 462,700                            | 291,000                               | 1,050,400                                       | IncK2 (CMY-2)                                | 88,889 (C)                                  |
|                                        |                                       |                                    |                                       |                                                 | IncF4:A5:B1<br>(TEM-1B)                      | 168,225 (C)                                 |
|                                        |                                       |                                    |                                       |                                                 | IncFII (aadA1,<br>aac(3)-Via, tetA,<br>sul1) | 117,389                                     |
|                                        |                                       |                                    |                                       |                                                 | Col (MG828)                                  | 1,700                                       |
| Ec15BL (E)                             | 100,000                               | 608,100                            | 268,100                               | 1,373,000                                       | IncK2 (CMY-2)                                | 85,509                                      |
|                                        |                                       |                                    |                                       |                                                 | IncF4:A-:B1                                  | 144,103                                     |
|                                        |                                       |                                    |                                       |                                                 | Col (MG828)                                  | 2,439                                       |

124 Notes:

125 <sup>a</sup>Phylogroup was determined using ClermonTyping (<http://clermontyping.iame-research.center/>).

126 <sup>b</sup>Hybrid assembly was done using Illumina short reads and MinION long reads. Hybrid assembly was used for  
127 antibiotic resistance gene (ARG) and plasmid identification. ARG carried by each plasmid are in parentheses.

128 <sup>c</sup>Plasmid contigs that are complete and circular (C) are identified.

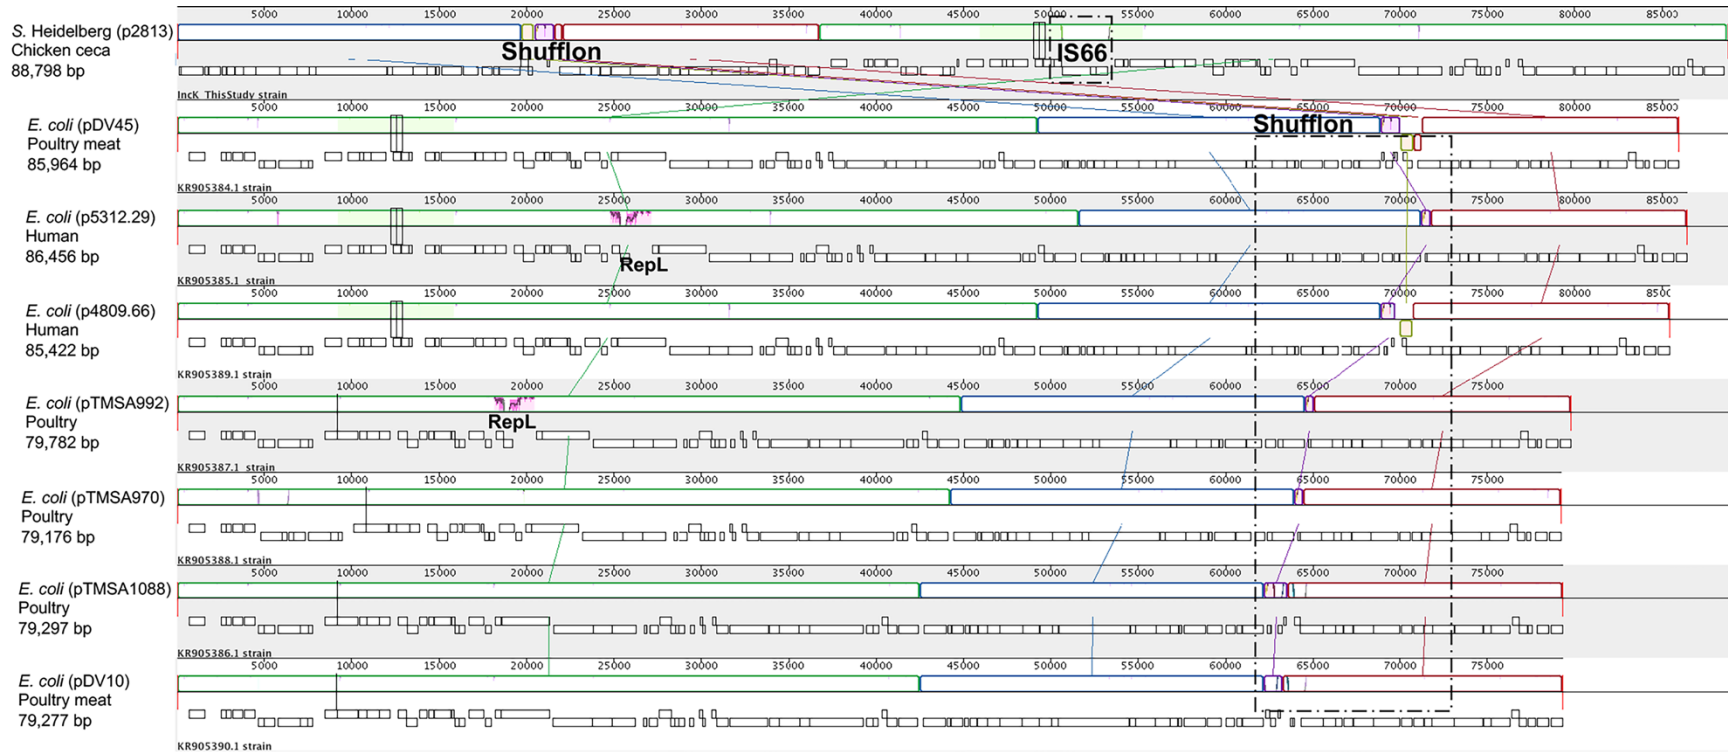

130

131 **Fig. S1** ProgressiveMauve alignment of IncK2 complete plasmid DNA sequences from this study and Seiffert et al (8). DNA regions

132 that differ between the IncK2 from this study and Seiffert et al (8) are highlighted with dashed horizontal black rectangular boxes.

133

134

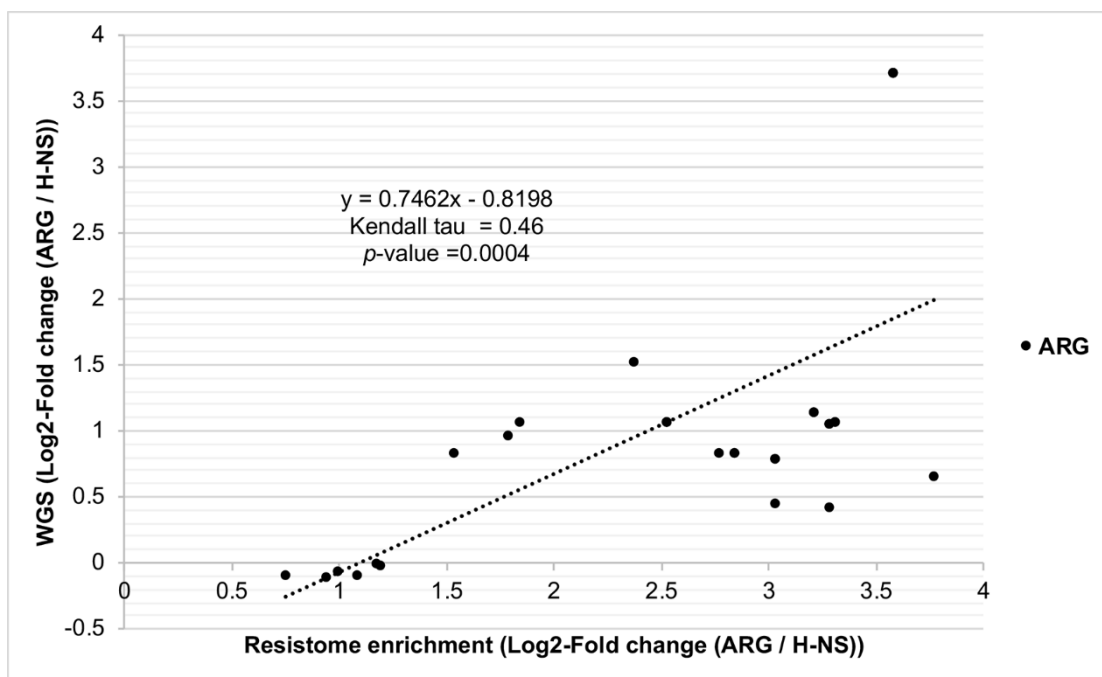

135

136 **Fig. S2** Correlation between WGS and resistome enrichment-based relative abundance determination. ARG abundance was calculated  
 137 by dividing the ARG contig coverage by the coverage of H-NS. ARG's (n =31) present in MDR *Salmonella* serovars (n =5) was used  
 138 for Kendall tau's correlation test.

139

140

141

142

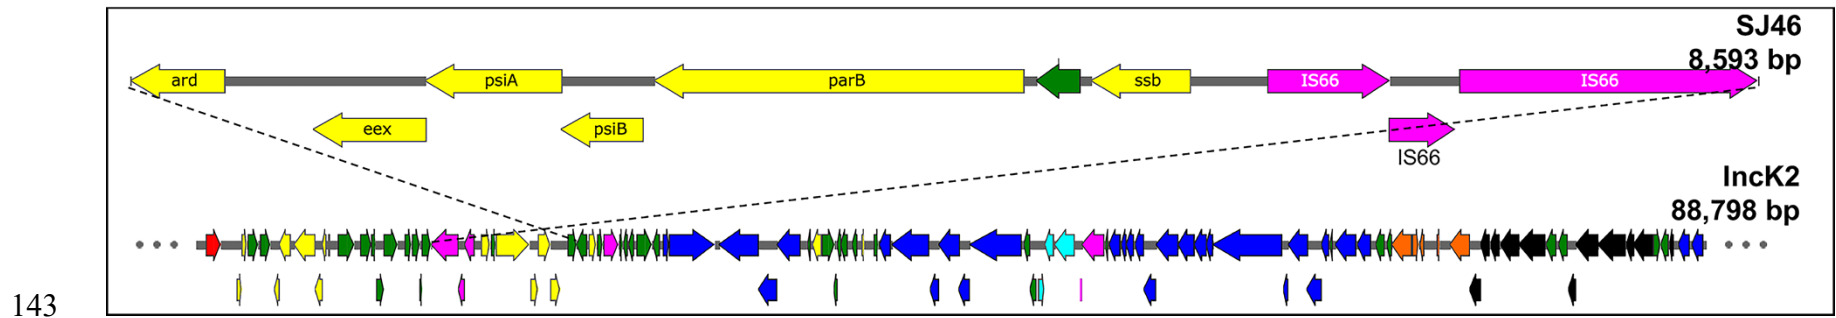

143

144 **Fig. S3** Annotated map of predicted P1-like phage genome present in the IncK2 plasmid from this study. Dashed diagonal black lines  
 145 denotes phage SJ46 region identified by PHAST. Map was drawn using SnapGene v.4.3.8.1.

146

147

148

149

150

151

152

153

154

155

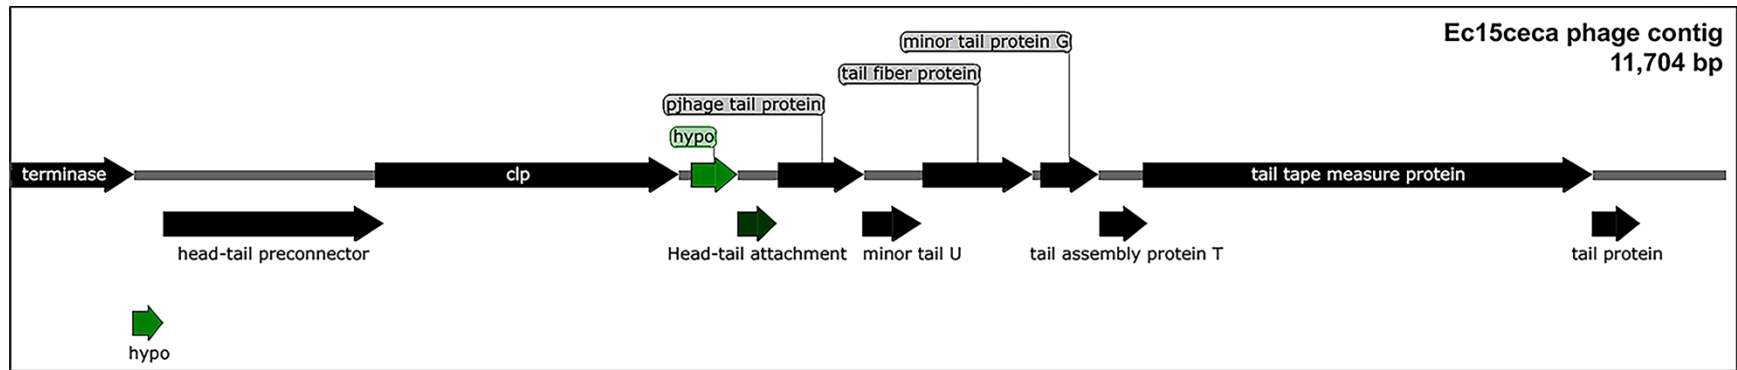

156

157 **Fig. S4** Annotated mEp460 phage contig of strain Ec15ceca sharing homology with IncK2 *incRNAi*-rep region. The *incRNAi*-rep  
 158 sequence of IncK2 plasmids was queried (tblastx) against the de novo assembled genome of Ec15ceca. Map was drawn using SnapGene  
 159 v.4.3.8.1.

160

161

162

163

164

165

166

167

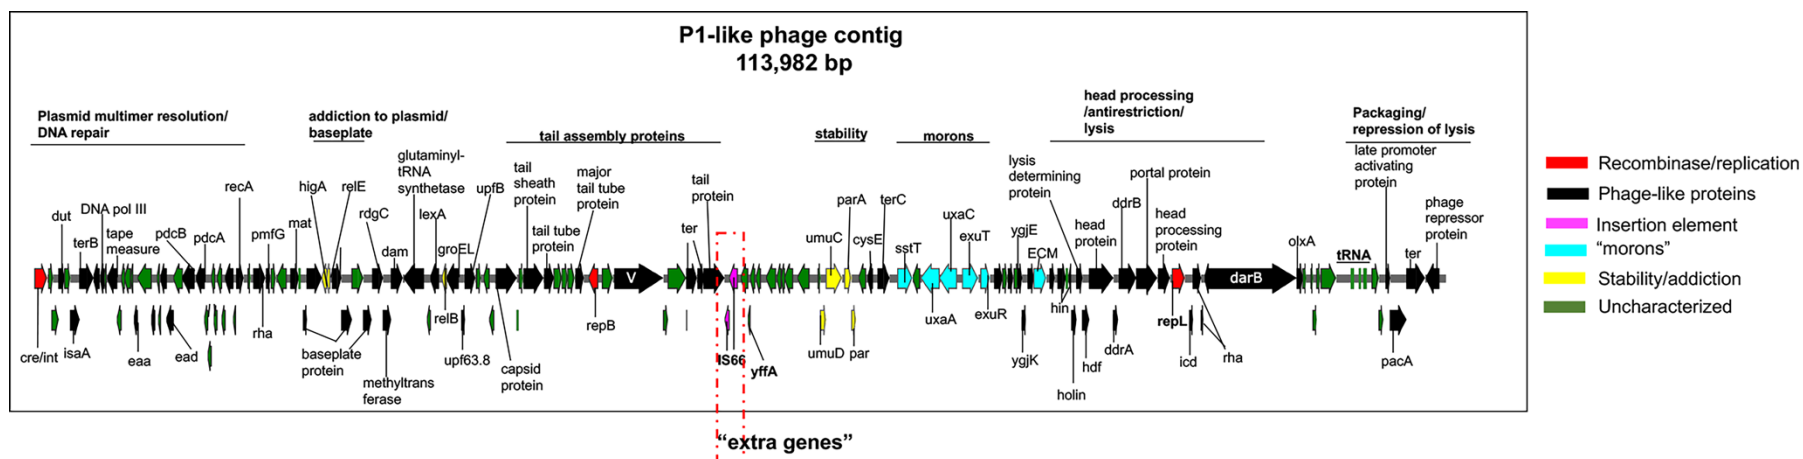

169

170 **Fig. S5** P1-like phage identified in *E. coli* genome by PHAST. Dashed red rectangular box is to highlight "extra genes" discussed in  
 171 manuscript.

172

173

174

175

176

177

178



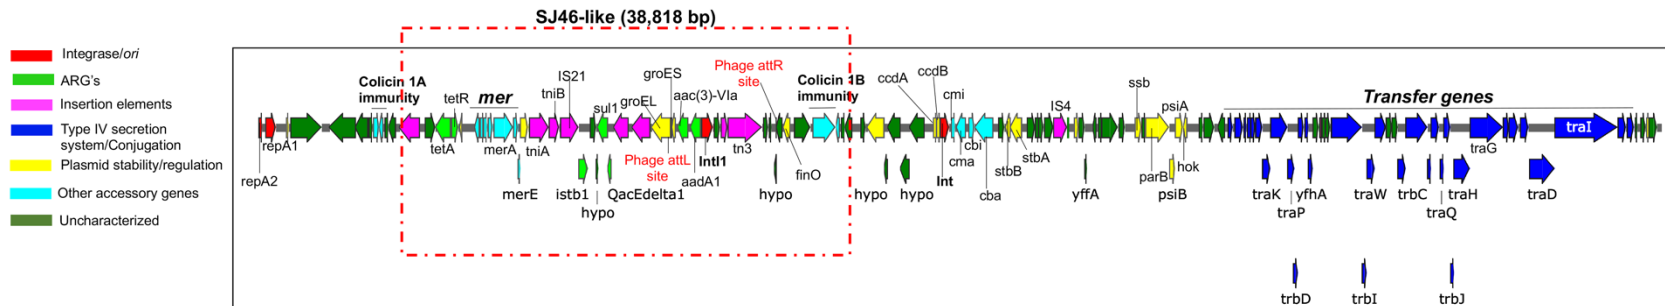

179

180 **Fig. S6** Annotated map of putative IncFII contig (119,056 bp) transferred *in vitro* from *E. coli* to *S. Heidelberg*. Dashed rectangular red  
 181 box denotes “predicted” P1-like phage region identified by PHAST. Map was drawn using SnapGene v.4.3.8.1.

182

183

184

185

186

187

188

189

## 190 **References:**

- 191 1. Lucchini S, Rowley G, Goldberg MD, Hurd D, Harrison M, Hinton JC. H-NS mediates  
192 the silencing of laterally acquired genes in bacteria. *PLoS Pathog.* 2006;2(8):e81.
- 193 2. Picker M, Wing H. H-NS, its family members and their regulation of virulence genes in  
194 *Shigella* species. *Genes.* 2016;7(12):112.
- 195 3. Bolger AM, Lohse M, Usadel B. Trimmomatic: a flexible trimmer for Illumina sequence  
196 data. *Bioinformatics.* 2014;30(15):2114-20.
- 197 4. Oladeinde A, Cook K, Orlek A, Zock G, Herrington K, Cox N, Lawrence JP, Hall C.  
198 Hotspot mutations and ColE1 plasmids contribute to the fitness of *Salmonella* Heidelberg in  
199 poultry litter. *PLoS One.* 2018;13(8):e0202286.
- 200 5. Rozwandowicz M, Brouwer MS, Zomer AL, Bossers A, Harders F, Mevius DJ, Wagenaar  
201 JA, Hordijk J. Plasmids of Distinct IncK Lineages Show Compatible Phenotypes. *Antimicrob*  
202 *Agents Chemother.* 2017;61(3).
- 203 6. Yang L, Li W, Jiang GZ, Zhang WH, Ding HZ, Liu YH, Zeng ZL, Jiang HX.  
204 Characterization of a P1-like bacteriophage carrying CTX-M-27 in *Salmonella* spp. resistant to  
205 third generation cephalosporins isolated from pork in China. *Sci Rep.* 2017;7:40710.
- 206 7. Johnson TJ, Shepard SM, Rivet B, Danzeisen JL, Carattoli A. Comparative genomics and  
207 phylogeny of the IncI1 plasmids: a common plasmid type among porcine enterotoxigenic  
208 *Escherichia coli*. *Plasmid.* 2011;66(3):144-51.
- 209 8. Seiffert SN, Carattoli A, Schwendener S, Collaud A, Endimiani A, Perreten V. Plasmids  
210 carrying Blacmy -2/4 in *Escherichia coli* from poultry, poultry meat, and humans belong to a novel  
211 IncK subgroup designated IncK2. *Front Microbiol.* 2017;8:407.

212

213

214

215

216

217
